# Supplementary material for: Aqueous Extract of Phyllanthus emblica L. Alleviates Functional Dyspepsia through Regulating Gastrointestinal Hormones and Gut Microbiome In Vivo
Source: MDPI journal article supplement (doi:10.3390/foods11101491), 2022-05-20
Supplement: s1 [file s1]

## Supplementary Material

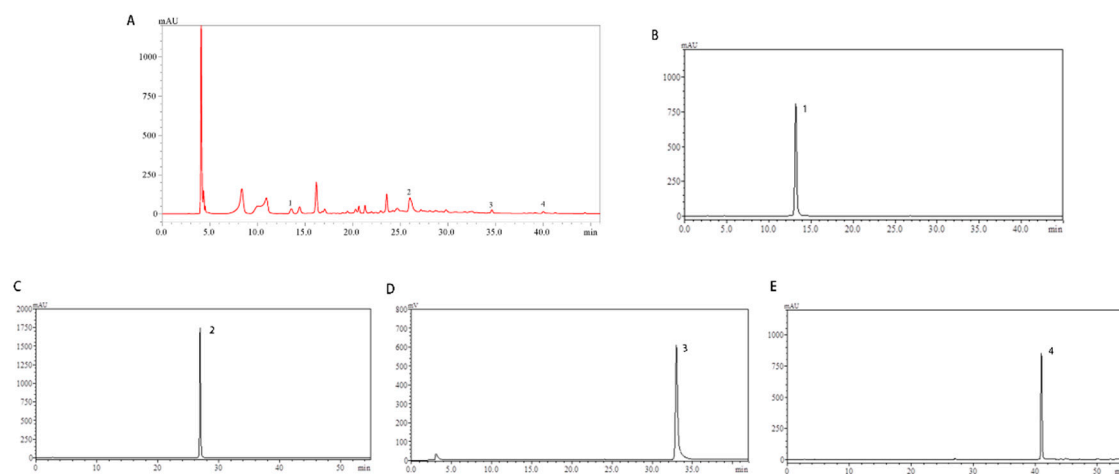

**Figure S1** Representative high-performance liquid chromatograms of APE sample (A) and standard compounds (B–E). 1, Gallic acid; 2, corilagin; 3, ellagic acid; and 4, fistin.
